# Supplementary material for: Identification of potential drugs for treatment of hepatic lipidosis in cats using an in vitro feline liver organoid system
Source: PubMed Central journal article supplement — J Vet Intern Med. 2019 Dec 12;34(1):132–8. doi: 10.1111/jvim.15670 (PMC6979087; doi:10.1111/jvim.15670), 2019-12-12
Supplement: JVIM-34-132-s002.pdf [file JVIM-34-132-s002.pdf]

**Supplementary Table 1**

| <b>Drug</b>             | <b>Category</b>         | <b>Reference</b> |
|-------------------------|-------------------------|------------------|
| fenofibrate             | PPAR $\alpha$ agonist   | <sup>30</sup>    |
| Wy-14643                | PPAR $\alpha$ agonist   | <sup>31</sup>    |
| pioglitazone            | PPAR $\gamma$ agonist   | <sup>32,33</sup> |
| rosiglitazone           | PPAR $\gamma$ agonist   | <sup>32</sup>    |
| T863                    | DGAT1 inhibitor         | <sup>34</sup>    |
| PF 06424439             | DGAT2 inhibitor         | <sup>35</sup>    |
| DNP (2,4-dinitrophenol) | mitochondrial uncoupler | <sup>36,37</sup> |
| AICAR                   | AMP kinase activator    | <sup>23</sup>    |

## Supplementary Table 2

### Primers

| Gene                                                                                          | 5'-3'   |                           | Tm (°C) |
|-----------------------------------------------------------------------------------------------|---------|---------------------------|---------|
| Leucine-rich repeat-containing G protein-coupled receptor 5 ( <i>LGR5</i> )                   | Forward | GGAAAGTTTGACTTTAACTGGA    | 58      |
|                                                                                               | Reverse | GCAGGTTGTAAGATAGATCTAGCA  |         |
| Transthyretin ( <i>TTR</i> )                                                                  | Forward | CAAAGTGGAAATAGACACCAAGTC  | 58      |
|                                                                                               | Reverse | GTGAACACCACCTCTGCA        |         |
| Cytochrome 3A132 ( <i>CYP3A132</i> )                                                          | Forward | GGTGCTCCTCTATCTATATGGGA   | 60      |
|                                                                                               | Reverse | TCTGTGATCGCCAACACTG       |         |
| Perilipin 2 ( <i>PLIN2</i> )                                                                  | Forward | TCGCAGTTAATCCACAACC       | 64      |
|                                                                                               | Reverse | CACGGACTTCAAGCAAGG        |         |
| Tyrosine 3-monooxygenase/tryptophan 5-monooxygenase activation protein, zeta ( <i>YWHAZ</i> ) | Forward | GAAGAGTCCTACAAAGACAGCACGC | 65      |
|                                                                                               | Reverse | AATTTTCCCCTCCTTCTCCTGC    |         |
| Ribosomal protein S5 ( <i>RPS5</i> )                                                          | Forward | CAGGTCTTGGTGAATGCG        | 58      |
|                                                                                               | Reverse | CCAGATGGCCTGATTCAC        |         |
| Hypoxanthine phosphoribosyltransferase ( <i>HPRT-1</i> )                                      | Forward | TTATGGACAGGACCGAGC        | 60      |
|                                                                                               | Reverse | GTCAGCAAAGAATTTATAGCCC    |         |
| Hydroxymethylbilane synthase ( <i>HMBS</i> )                                                  | Forward | CAAACAGACAGTGTGGTGGCAG    | 62      |
|                                                                                               | Reverse | AGAATCTTGTCCTGTGGTGG      |         |
