# Supplementary figures and images for: Identification of potential drugs for treatment of hepatic lipidosis in cats using an in vitro feline liver organoid system
Source: PubMed Central journal article supplement — J Vet Intern Med. 2019 Dec 12;34(1):132–8. doi: 10.1111/jvim.15670 (PMC6979087; doi:10.1111/jvim.15670), 2019-12-12

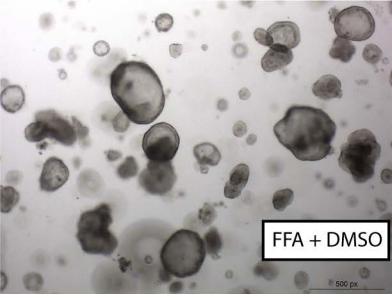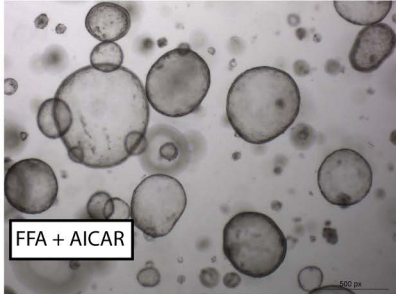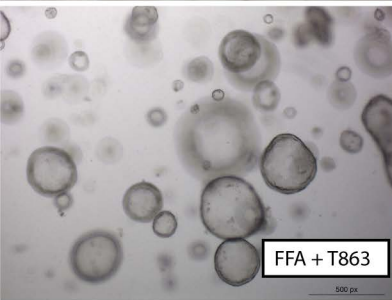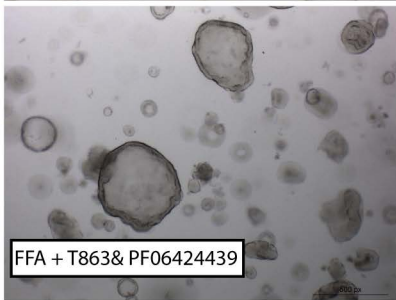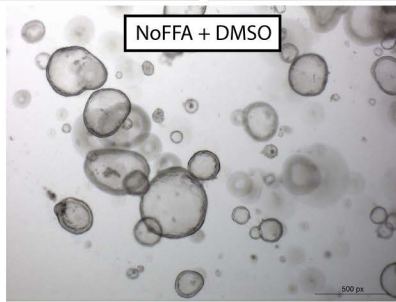

Supplement: JVIM-34-132-s001.pdf [file JVIM-34-132-s001.pdf]
